# Supplementary material
Source: PubMed Central journal article supplement (PMC4343121)
Supplement: pnas.1416622112.sapp.pdf [file pnas.1416622112.sapp.pdf]

# Crossovers are associated with mutagenesis and biased gene conversion in recombination hotspots

Barbara Arbeithuber<sup>1</sup>, Andrea J. Betancourt<sup>2</sup>, Thomas Ebner<sup>3,4</sup>, Irene Tiemann-Boege<sup>1\*</sup>

## SI Appendix Content:

|                                                                                                                                      |           |
|--------------------------------------------------------------------------------------------------------------------------------------|-----------|
| <b><i>SI Materials and Methods</i></b> .....                                                                                         | <b>2</b>  |
| 1. PCR conditions for crossover and non-recombinant collection .....                                                                 | 2         |
| 2. Opposing effects of biased gene conversion and mutation .....                                                                     | 3         |
| 3. Supporting References.....                                                                                                        | 5         |
| <b><i>Supporting Figures</i></b> .....                                                                                               | <b>6</b>  |
| Figure S1. Analysis of differences in mutations and CCOs between donors and hotspots. ....                                           | 6         |
| Figure S2. Crossover distribution, mutations, and CCOs in HSII. ....                                                                 | 7         |
| Figure S3. Analysis of gBGC and equilibrium GC content. ....                                                                         | 8         |
| Figure S4. Estimation of crossover frequency between donors.....                                                                     | 10        |
| Figure S5. Rationale for the test of an effect of strong (S) vs. weak (W) alleles on the distribution of crossover reciprocals. .... | 11        |
| Figure S6. Sequence analysis. ....                                                                                                   | 12        |
| <b><i>Supporting Tables</i></b> .....                                                                                                | <b>13</b> |
| Table S1. Mutations in crossovers and non-recombinant controls.....                                                                  | 13        |
| Table S2. CpG methylation in sperm and testis.....                                                                                   | 15        |
| Table S3. Transmission bias of haplotypes. ....                                                                                      | 16        |
| Table S4. Complex crossovers (CCO). ....                                                                                             | 18        |
| Table S5. Crossover frequencies in HSI and HSII. ....                                                                                | 20        |
| Table S6. Primers and annealing temperatures used for genotyping. ....                                                               | 21        |
| Table S7. Sequencing primers.....                                                                                                    | 22        |
| Table S8. Primers for CpG methylation analysis.....                                                                                  | 23        |
| Table S9. gBGC analysis.....                                                                                                         | 24        |

## SI Materials and Methods

### 1. PCR conditions for crossover and non-recombinant collection

Allele-specific primers were designed for each SNP and used according to the required haplotype. Phosphorothioate bonds (indicated in lower case), protected the 3' primer ends from the 3'-5' exonuclease activity of the polymerase and increased the specificity of the assay. Red letters indicate additional bases in the primer sequences, not present in the genomic sequence, to adjust the annealing temperature of the primer.

#### Hotspot I (HSI)

| Primer                      | SNP       | Primer sequence                        | Product length |
|-----------------------------|-----------|----------------------------------------|----------------|
| 1 <sup>st</sup> PCR forward | rs6517577 | CTC AAT AGT CCA CAT GGA AAC tta (a/c)  | 4187 bp        |
| 1 <sup>st</sup> PCR reverse | rs2299775 | AGC AAT TCC CCT GGT TGt gt(t/c)        |                |
| 2 <sup>nd</sup> PCR forward | rs2244084 | AGA ATC CAC CAT AGT GAG AGA Tagc (a/g) | 3761 bp        |
| 2 <sup>nd</sup> PCR reverse | rs2299774 | AAA GCA GAT TGG CTC CTt gg(t/c)        |                |

#### Cycling conditions:

##### 1<sup>st</sup> PCR

94 °C 2 min  
 94 °C 15 sec  
 63 °C 15 sec } 5x  
 72 °C 60 sec  
 94 °C 15 sec  
 63 °C 15 sec } 25x  
 72 °C 90 sec  
 72 °C 2 min

##### 2<sup>nd</sup> PCR

94 °C 2 min  
 94 °C 15 sec  
 56 °C 15 sec } 45x  
 72 °C 60 sec  
 82 °C 5 sec  
 72 °C 2 min  
 Melting curve (65 – 95 °C)

#### Hotspot II (HSII)

| Primer                      | SNP        | Primer sequence                                 | Product length |
|-----------------------------|------------|-------------------------------------------------|----------------|
| 1 <sup>st</sup> PCR forward | rs7201177  | <b>T</b> AG GAC GTC TCT CTG ctt (c/g)           | 3566 bp        |
| 1 <sup>st</sup> PCR reverse | rs12149730 | GTA AGT GCT ATG TTC AGA A <b>C</b> a ga(t/c)    |                |
| 2 <sup>nd</sup> PCR forward | rs1861187  | <b>G</b> CG ATT GAA ATA ATC AGG TTt ca(c/t)     | 3326 bp        |
| 2 <sup>nd</sup> PCR reverse | rs4786855  | GAA GTA GCA ATG AGA GAG AGA A <b>G</b> a a(t/g) |                |

#### Cycling conditions

##### 1st PCR

94 °C 2 min  
 94 °C 15 sec  
 63 °C 15 sec } 5x  
 72 °C 60 sec  
 94 °C 15 sec  
 63 °C 15 sec } 25x  
 72 °C 90 sec  
 72 °C 2 min

##### 2nd PCR

94 °C 2 min  
 94 °C 15 sec  
 56 °C 15 sec } 45x  
 72 °C 60 sec  
 82 °C 5 sec  
 72 °C 2 min  
 Melting curve (65 – 95 °C)

## 2. Opposing effects of biased gene conversion and mutation

The expected GC content at equilibrium is estimated as 100% based on the formula  $1/[1+\kappa(\exp(-2N_e b))]$  (1, 2), where  $b$  is the heterozygous selection coefficient favoring GC,  $N_e$  is the effective population size, and  $\kappa$  is the ratio of mutation rate to AT vs. rates to GC mutation rates (*i.e.*, the S>W mutation rate divided by the W>S mutation rate).

*Transmission advantage (gBGC).* The preferential transmission of GC alleles due to gBGC (expressed as  $b$ ) can be obtained from the transmission bias (2, 3), and is calculated as  $b = 2x - 1$ , where  $x$  is the fraction of over-transmission considering all gametes (crossovers and non-recombinants) and can be defined as  $x = (1-c)0.5+c(p_{GC})$ , with  $c$  being the crossover frequency estimated from the data (**SI Appendix, Fig. S4, Table S5**). If we assume that gBGC is restricted to male meioses, as suggested by (4), this advantage would be halved. The value for  $p_{GC}$  was calculated directly from the weighted odds-ratio, which is an estimate of the ratio of the odds of transmitting a GC allele and the odds of transmitting an AT allele, e.g.,  $wOR = [p_{GC}/(1-p_{GC})]/[p_{AT}/(1-p_{AT})]$ . From this, we see that  $p_{GC} = \sqrt{wOR} / (1 + \sqrt{wOR})$ , which denotes the fraction GC alleles at polymorphic sites favored in crossovers.

*Estimating  $N_e$ .* To obtain an estimate of  $N_e$  specific to the local region, we used data from the 1000 genomes project from the 5kb region around HSI to calculate Watterson's  $\theta$ , an estimate of  $4N_e u$  (with  $u$  being the mutation rate). We used only segregating sites in Europe from sequences with genotypes with significant support (based on the genotype likelihoods given in the vcf files calculated by the 1000 genomes project). Using the observed theta of  $1.36 \times 10^{-3}$  and the corrected hotspot mutation rate for HSI ( $\mu_{HS}$ ) given in **Table 1** of  $2.07 \times 10^{-8}$ , we obtain an  $N_e$  estimate of 16,425, very similar to the usual value of 20,000 (5). We note that while human demographic history includes dramatically changing population sizes [e.g. (6)], our primary interest here is what our measurements would predict for equilibrium GC content—that is, whether AT-biased mutation or GC-biased gene conversion dominates patterns of sequence evolution in the long run.

*Estimating  $\kappa$ .* The mutation bias parameter,  $\kappa = \mu_{HS}(S>W)/\mu_{HS}(W>S)$ , can be obtained from the data summarized in **Table 2**.

Taken together, we can use these parameter estimates to predict a GC content at equilibrium of 100%. If we consider that the observed rate of gBGC may only be valid for male meioses (see above), the predicted equilibrium GC content is still very high—99%. In general, this conclusion is quite robust to uncertainty in our estimates; as **SI Appendix, Fig. S3C** shows, most sites have GC alleles for values of  $\kappa$  and  $b$  within the 95% CI for our estimates. In fact, the equilibrium GC content dips below 50% only when the effect of biased gene conversion approaches neutrality (*i.e.*, with  $2N_e b$  close to 1, and  $b \approx 1 \times 10^{-5}$ ). The observed GC content is much lower, around 45% as described in the text. The reason is probably due to the short lifespan of recombination hotspots, though note that our analysis also ignored any effect of selection on base composition. **SI Appendix, Fig. S3A** shows that the equilibrium GC depends also on the intensity of the hotspot given as the recombination frequency,  $c$ . Assuming that the recombination frequency is reduced by a different percentage (0.2, 0.4, 0.6 and 0.8) from the previous step, once a very low recombination frequency is reached ( $\sim 3 \times 10^{-6}$

equivalent to  $\sim 0.1\text{cM/Mb}$  a level below an active hotspot), the GC content is solely determined by the average human mutation rates  $\mu_{\text{hAve}}(S>W)$  and  $\mu_{\text{hAve}}(W>S)$ , reaching an equilibrium GC of 31%.

### 3. Supporting References

1. Bulmer MG (1991) The selection-mutation-drift theory of synonymous codon usage. *Genetics* 129(3):897-907.
2. Nagylaki T (1983) Evolution of a finite population under gene conversion. *Proc Natl Acad Sci U S A* 80(20):6278-6281.
3. Gutz H & Leslie JF (1976) Gene conversion: a hitherto overlooked parameter in population genetics. *Genetics* 83(4):861-866.
4. Duret L & Galtier N (2009) Biased gene conversion and the evolution of mammalian genomic landscapes. *Annual review of genomics and human genetics* 10:285-311.
5. Charlesworth B (2009) Fundamental concepts in genetics: effective population size and patterns of molecular evolution and variation. *Nature reviews. Genetics* 10(3):195-205.
6. Schiffels S & Durbin R (2014) Inferring human population size and separation history from multiple genome sequences. *Nat Genet.*
7. Pratto F, *et al.* (2014) Recombination initiation maps of individual human genomes. *Science* 346(6211):1256442.
8. Garwood F (1936) Fiducial Limits for the Poisson Distribution. *Biometrika* 28(3-4):437-442.
9. Patil VV & Kulkarni HV (2012) Comparison of Confidence Intervals For The Poisson Mean: Some New Aspects. *REVSTAT- Statistical Journal* 10(2):211-227.
10. Minton JA, Flanagan SE, & Ellard S (2011) Mutation surveyor: software for DNA sequence analysis. *Methods in molecular biology* 688:143-153.

## Supporting Figures

Figure S1

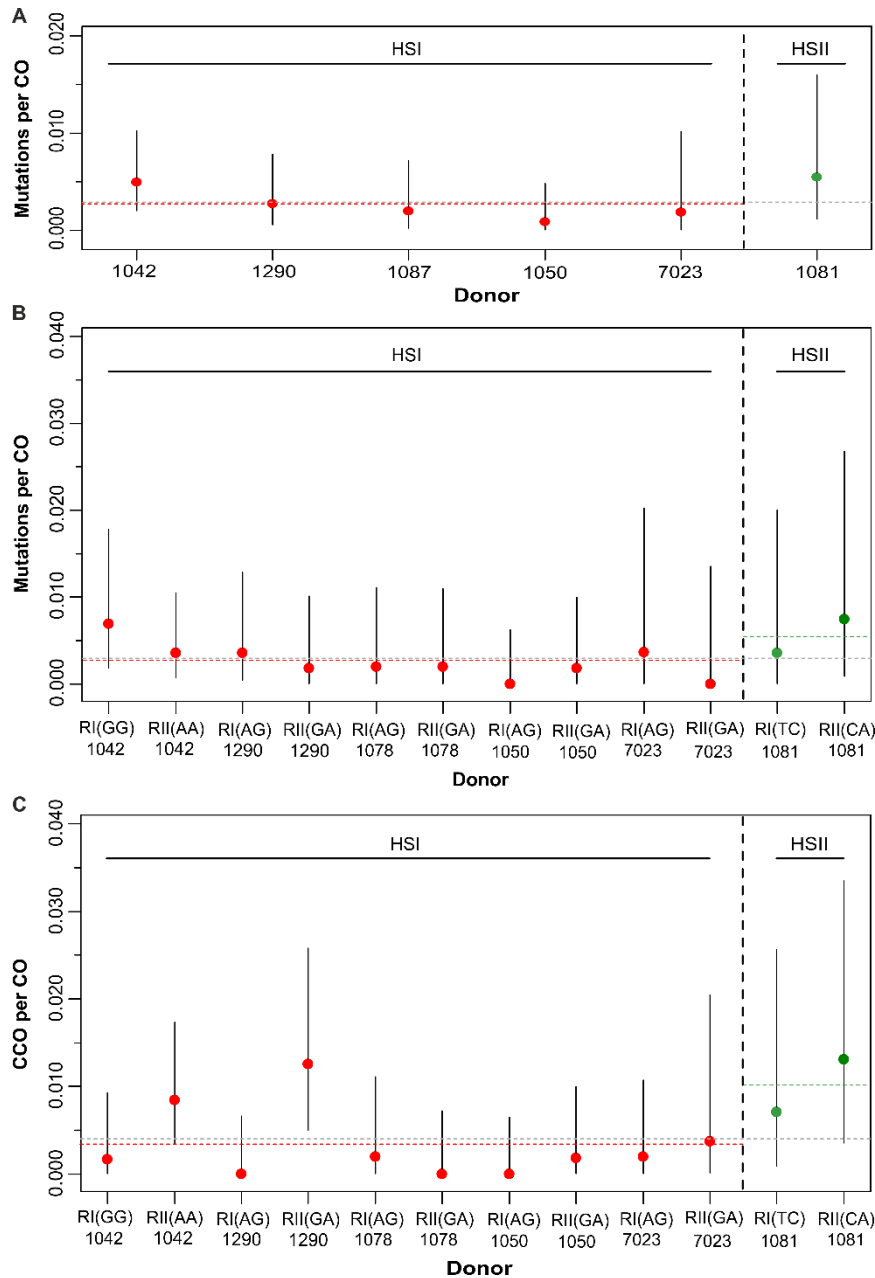

**Figure S1. Analysis of differences in mutations and CCOs between donors and hotspots.**

**(A+B) Differences of mutation frequencies between donors and reciprocals.** The number of mutations showed no heterogeneity among donors (exact multinomial test,  $p = 0.630$ ), or among the reciprocals treated individually (exact multinomial test,  $p = 0.3593$ ), and were also statistically indistinguishable between hotspots (Fisher's exact test,  $p = 0.215$ ). The dotted grey line denotes the average mutation frequency for HSI and HSII, the dotted red line for HSI, and the dotted green line for HSII. **(C) Distribution of CCO frequencies per crossover (CO) measured in six different donors for both types of CO (RI and RII).** The dashed grey line denotes the average CCO frequency per CO at 0.41% (0.26-0.60%; Poisson CI), the dashed red and green line show the average CCO frequency per CO at 0.35% (0.21-0.54; Poisson CI) and 1.02% (0.37-2.22; Poisson CI) for HSI and HSII, respectively. Donors 1042 and 1290 show larger differences in CCO frequencies per CO between reciprocals, but none are statistically significant (Fisher's exact test  $p = 0.748$  for donor 1042,  $p = 0.092$  for donor 1290, and  $p = 1$  for all others after Bonferonni multiple-testing correction).

Figure S2

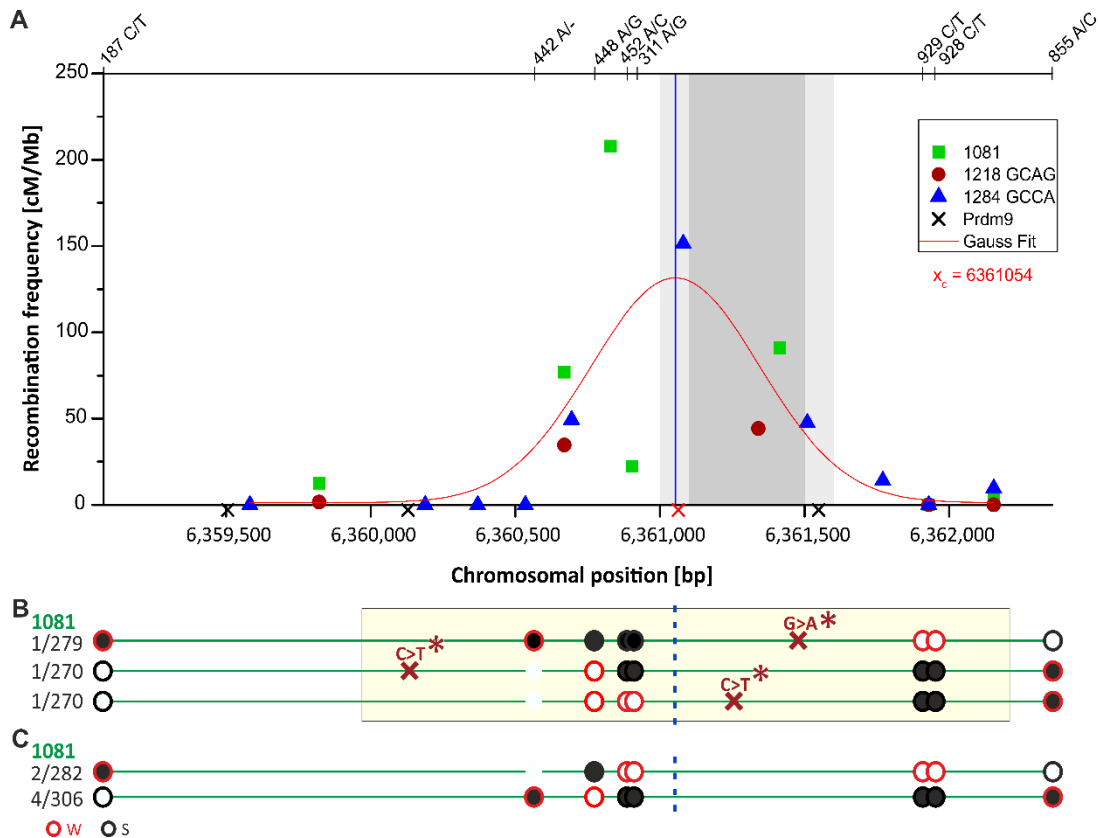

**Figure S2. Crossover distribution, mutations, and CCOs in HSII.**

**(A) CO distribution based on both reciprocal crossovers (RI+RII).** Data comes from donor 1081 and one reciprocal of donors 1218 and 1284 (each mark represents a different donor). A best-fit normal distribution (Gaussian function) shows the hotspot center at its maximum at chr16:6,361,054 (vertical line). The region harboring the DSBs with high probability (7) is marked by the grey shaded area. Motifs for PRDM9 allele A are shown as crosses (red without mismatch, black with one mismatch) on the x-axis. **(B) Distribution of mutations.** The mutations identified on different haplotypes for donor 1081 are shown as red crosses (CpG sites are denoted with an asterisk). The yellow shaded area denotes the sequenced region. Aligned with the crossover distribution are black and white circles representing heterozygous SNPs with a red and black rim denoting the type of SNP (AT-Weak and GC-Strong, respectively; no rim is an InDel), whereas grey shaded circles represent homozygous polymorphisms. The vertical dotted line is the estimated hotspot center. **(C) CCOs identified in the same donor as above from 588 collected crossovers.** The haplotype of each CCO is shown with circles representing SNPs. The frequency of each CCO per crossover haplotype is shown to the left under the donor-ID.

**Figure S3**

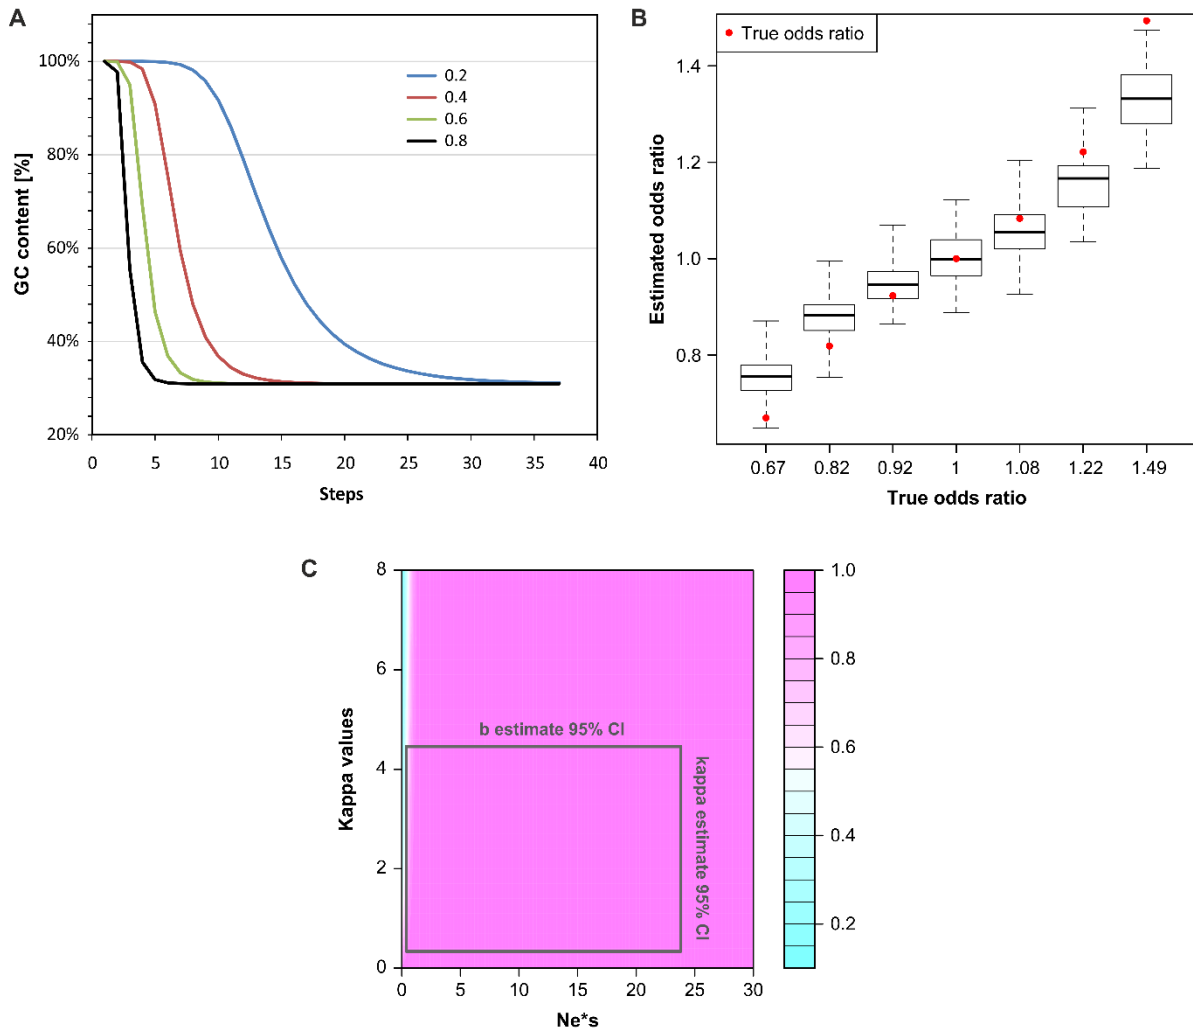

**Figure S3. Analysis of gBGC and equilibrium GC content.**

**(A) Effect of the crossover frequency on equilibrium GC content.** Equilibrium GC content was estimated by the Li-Bulmer equation (1) assuming a gBGC of 52.3% and a corrected mutation frequency  $\mu\text{CO}_{\text{total}}$  of  $8.8 \times 10^{-7}$ ;  $\mu\text{CO}_{\text{S} \rightarrow \text{W}} = 1.71 \times 10^{-6}$ ;  $\mu\text{CO}_{\text{W} \rightarrow \text{S}} = 1.55 \times 10^{-7}$  estimated from the data of HSI. The crossover frequency starts at  $1 \times 10^{-2}$ , equivalent to 532 cM/Mb and is reduced by 20, 40, 60 or 80% from the previous step. If the crossover rate is low enough ( $\sim 3 \times 10^{-6}$  equivalent to 0.1cM/Mb), then the equilibrium GC is only influenced by the effect of genome wide average mutation rates reaching 31%, and the contribution of CO associated gBGC and mutagenesis is negligible. **(B) Simulations testing the estimation procedure for the odds-ratio from the Cochrane Mantel Haenszel (CMH) used to calculate the gBGC.** As this analysis suffers from some non-independence (COs that stop distal to one SNP are also those that stop proximal to the next SNP), we evaluated its performance with simulations. We simulated CO and gene conversion under a range of biases (with 45-55% transmission of GC alleles) to obtain simulated data sets of a size corresponding to the fewest recombinants recovered per donor, and analyzed the simulated data in the same way as the real data. Recombinants from 5 donors were simulated, corresponding roughly to the minimum data set sizes for HSI ( $n = 601, 562, 503, 571, 275$ ). For each recombinant, a breakpoint was chosen depending on its distance from the DSB; the locations of these breakpoints were exponentially distributed with scale parameter = 100. GC alleles were favored in the simulations according to the true input odds-ratio (x-axis and red points); odds-ratios were estimated from the simulated data as described for the real data from the CMH test (boxplots). For each odds-ratio, 100 data sets were simulated. The whiskers on the boxplots extend to the extreme simulated data points, and the red dots indicate the odds ratios used in the simulations. In addition, we also performed 50,000 simulations under the null hypothesis of equal



transmission (*i.e.*, with a true odds ratio of 1, and find that we reject the null model with the CMH test less than 3% of the time, suggesting this analysis is slightly conservative. **(C) Equilibrium GC content with varying kappa and  $b$  values.** Equilibrium GC content was calculated for a range of kappa and  $N_e b$  values. The grey rectangle indicates values within the 95% CI limits of our estimates. For kappa, confidence intervals were calculated as  $\pm 1.96$  s.e., with s.e. calculated from the number of mutational events in crossovers, adjusted for the non-crossover rate, using  $\sqrt{((1/\mu_{SW})+(1/\mu_{WS})-(1/GC\text{-sites})-(1/AT\text{-sites}))}$ . Confidence limits for  $b$  were calculated from the 95% CI of the odds-ratio estimates from the Cochran-Mantel Haenszel test done on HSI data, *i.e.* 1.04, 1.40. The lower (upper) limit assumes a transmission ratio consistent with this lower (upper) bound, gene conversion occurring only during male (both male and female) meioses, and is calculated using the lower (upper) bound CI for the donor with the lowest (highest) crossing over rate. The colors in the heatmap indicate the percent GC content expected at equilibrium given the values of  $b$  and kappa, calculated using the Li-Bulmer equation.

**Figure S4**

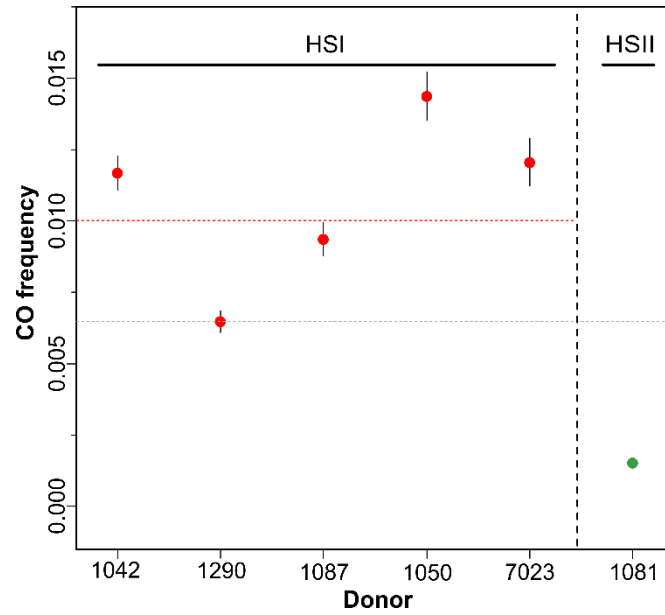

**Figure S4. Estimation of crossover frequency between donors.**

Individual donor crossover frequencies. Crossovers were measured in HSI or HSII in a 3761 bp or 3326 bp region, respectively; in a total of 6061 sequenced samples (25 complex crossover sequences were not included). Poisson confidence intervals (CI) of crossover frequencies were calculated according to Garwood 1938 (8), following (9), with lower and upper bounds of  $\chi^2_{2x, 0.025}/2$  and  $\chi^2_{2x+1, 0.975}/2$ , respectively, where x is the observed number of crossovers. CI for rates were determined by dividing these limits by the number of total amplifiable meioses. The dashed red or grey lines show the average crossover (CO) frequency for HSI or for both HSI + HSII, respectively.

**Figure S5**

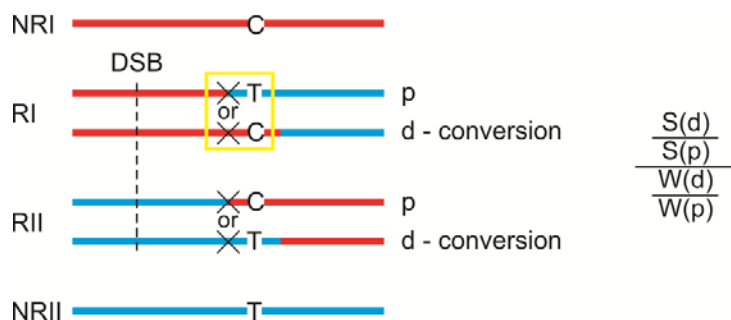

**Figure S5. Rationale for the test of an effect of strong (S) vs. weak (W) alleles on the distribution of crossover reciprocals.**

Recombination occurs between a red haplotype and blue haplotype. The DSB point is shown as a dotted line; from this point, crossovers can end at any point up- or downstream from the DSB (the figure shows a downstream crossover breakpoint marked with the cross). With equal transmission, the ratio of proximal (p) and distal (d) alleles recovered should be the same for both reciprocal crossovers. But if heteroduplexes preferentially resolve as a strong allele (eg. C) via a conversion event (yellow box), there will be more crossovers that seem to end distal from the C polymorphism in the RI crossover type, than crossovers that seem to end proximal to the C in the RII crossover type.

**Figure S6**

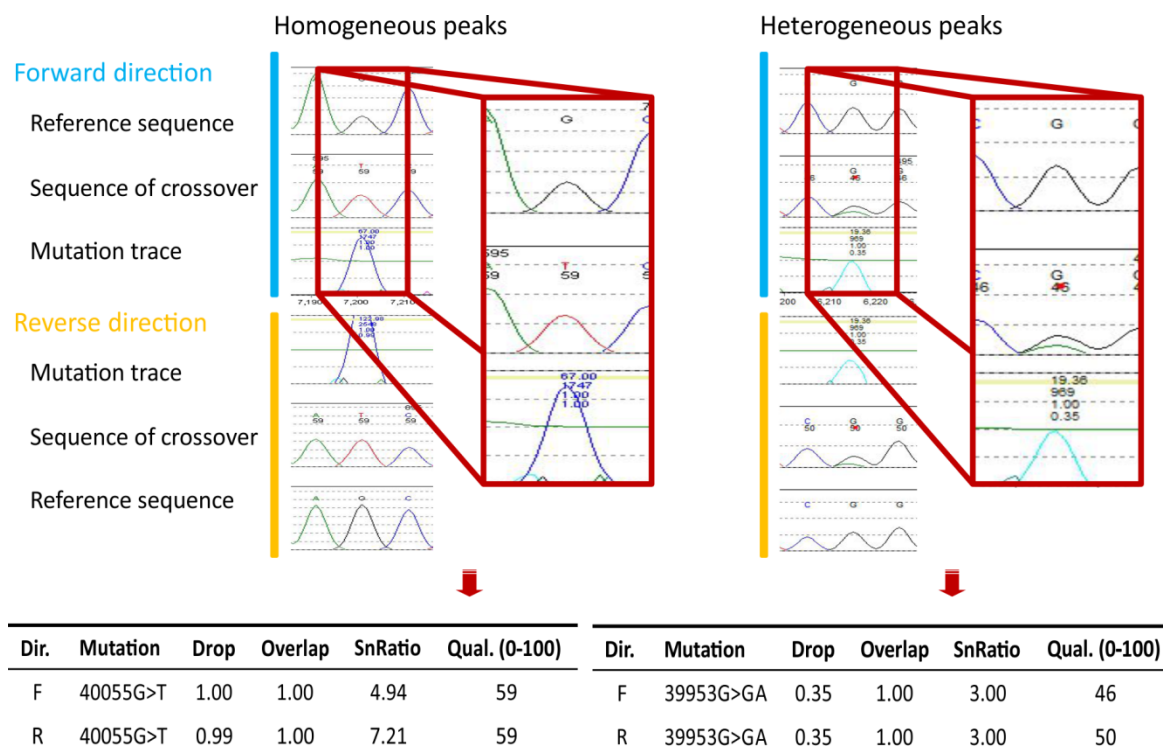

**Figure S6. Sequence analysis.**

Sequence analysis was performed using the Mutation Surveyor software (10). An example of a homogeneous and heterogeneous chromatogram peak is shown for both forward and reverse direction. Based on a number of parameters, such as the fraction of drop, overlap, signal to noise ratio and quality scores, the Mutation Surveyor package categorizes positions with alternate nucleotides as homogenous or heterogenous mutations. The alternate trace is compared to the reference sequence, which is a consensus chromatogram of all the sequencing reads.

## Supporting Tables

Table S1. Mutations in crossovers and non-recombinant controls.

| Donor        | HS | Recipr.    | #CO or #NR  | # mut     | mut/CO or mut/NR (%) | Effective sequenced sites |               |                | mut type | Position (hg19) | 2 <sup>nd</sup> PCR repeats | drop forward        | drop reverse   | Sequence context | Distance to HS center (bp) | Distance to CO | CO region size (bp) | Rel. to CO |                |                |         |     |         |     |    |
|--------------|----|------------|-------------|-----------|----------------------|---------------------------|---------------|----------------|----------|-----------------|-----------------------------|---------------------|----------------|------------------|----------------------------|----------------|---------------------|------------|----------------|----------------|---------|-----|---------|-----|----|
|              |    |            |             |           |                      | Total (Mb)                | CpG           | S (G/C)        |          |                 |                             |                     |                |                  |                            |                |                     |            |                |                |         |     |         |     |    |
| 1042         | I  | RI (GG)    | 577         | 4         | 0.693                | 1.3271                    | 34620         | 619121         | C → T    | 41277650        | 4x                          | 1.00/0.99/1.00/1.00 | 0.99           | CTGCAAT          | -860                       | ~ - 1380 bp    | 154                 | x\}        |                |                |         |     |         |     |    |
|              |    |            |             |           |                      |                           |               |                | G → A    | 41278433        | 1x                          | 0.87                | 0.98           | CCTGCC           | -77                        | at CO          | 1084                | \}         |                |                |         |     |         |     |    |
|              |    |            |             |           |                      |                           |               |                | G → A    | 41278855        | 2x                          | 0.96                | 0.99/1.00      | CACGCGC          | 345                        | at CO          | 1084                | \}         |                |                |         |     |         |     |    |
|              |    | RII (AA)   | 836         | 3         | 0.359                | 1.9228                    | 50160         | 897028         | C → T    | 41279487        | 2x                          | 1.00/1.00           | 1.00/1.00      | GCCGAGG          | 977                        | ~ 1000 bp      | 1084                | \x         |                |                |         |     |         |     |    |
|              |    |            |             |           |                      |                           |               |                | C → T    | 41279039        | 2x                          | 1.00/1.00           | 1.00           | GACGGGA          | 529                        | ~ 800 bp       | 1084                | \x         |                |                |         |     |         |     |    |
|              |    |            |             |           |                      |                           |               |                | G → A    | 41279077        | 2x                          | 1.00/0.99           | 1.00           | GCTGTCA          | 567                        | ~ 800 bp       | 1084                | \x         |                |                |         |     |         |     |    |
| 1290         | I  | RI (AG)    | 562         | 2         | 0.356                | 1.2926                    | 33720         | 603588         | C → T    | 41279315        | 2x                          | 0.99/0.99           | 0.90           | ACCAGA           | 805                        | ~ 900 bp       | 1084                | \x         |                |                |         |     |         |     |    |
|              |    |            |             |           |                      |                           |               |                | C → T    | 41277923        | 3x                          | 0.98/1.00/0.99      | 0.98/0.95/0.97 | AGCCGAG          | -587                       | at CO          | 1084                | \}         |                |                |         |     |         |     |    |
|              |    |            |             |           |                      |                           |               |                | C → T    | 41278531        | 3x                          | 0.95/1.00/1.00      | 0.99/0.94/0.93 | CTCCGTC          | 21                         | at CO          | 1084                | \}         |                |                |         |     |         |     |    |
|              |    | RII (GA)   | 553         | 1         | 0.181                | 1.2719                    | 33180         | 593369         | C → T    | 41278329        | 3x                          | 1.00/0.99/0.96      | 0.86/0.98/0.98 | TGGCAA           | -181                       | at CO          | 1084                | \}         |                |                |         |     |         |     |    |
|              |    |            |             |           |                      |                           |               |                | RI (AG)  | 504             | 1                           | 0.198               | 1.1592         | 30240            | 541296                     | T → C          | 41278834            | 3x         | 1.00/0.97/0.97 | 1.00/1.00/1.00 | TTTATG  | 324 | ~850 bp | 544 | \x |
|              |    |            |             |           |                      |                           |               |                | RII (GA) | 510             | 1                           | 0.196               | 1.1730         | 31620            | 548250                     | G → A          | 41279231            | 3x         | 1.00/0.93/0.96 | 0.99/0.94/0.96 | TTCGGAC | 721 | ~900 bp | 39  | \x |
| 1050         | I  | RI (AG)    | 595         | 0         | 0.000                | 1.3685                    | 35700         | 637840         | -        | -               | -                           | -                   | -              | -                | -                          | -              | -                   |            |                |                |         |     |         |     |    |
|              |    | RII (GA)   | 562         | 1         | 0.178                | 1.2926                    | 33720         | 602464         | C → T    | 41279582        | 4x                          | 1.00/0.90/0.97/0.99 | 0.97           | GGCGTG           | 1072                       | at CO          | 2462                | \}         |                |                |         |     |         |     |    |
| 7023         | I  | RI (AG)    | 276         | 1         | 0.362                | 0.6348                    | 16008         | 295596         | G → A    | 41277901        | 3x                          | 1.00/1.00/1.00      | 1.00/1.00/1.00 | CCAGGAG          | -609                       | ~ - 550 bp     | 392                 | x\}        |                |                |         |     |         |     |    |
|              |    | RII (AG)   | 272         | 0         | 0.000                | 0.6256                    | 17408         | 292672         | -        | -               | -                           | -                   | -              | -                | -                          | -              | -                   |            |                |                |         |     |         |     |    |
| 1081         | II | RI (TC)    | 279         | 1         | 0.358                | 0.5859                    | 16182         | 269793         | G → A    | 6361480         | 1x                          | 0.98                | 0.90           | TCCGCTC          | 426                        | at CO          | 986                 | \}         |                |                |         |     |         |     |    |
|              |    | RII (CA)   | 270         | 2         | 0.741                | 0.5670                    | 15120         | 260550         | C → T    | 6360138         | 1x                          | 1.00                | 0.92           | CCTCGGC          | -916                       | ~ - 650 bp     | 113                 | x\}        |                |                |         |     |         |     |    |
|              |    |            |             |           |                      |                           |               |                | C → T    | 6361259         | 1x                          | 0.98                | 0.90           | CACCGTA          | 205                        | at CO          | 986                 | \}         |                |                |         |     |         |     |    |
| <b>TOTAL</b> |    |            | <b>5796</b> | <b>17</b> | <b>0.293</b>         | <b>13.221</b>             | <b>347678</b> | <b>6161567</b> |          |                 |                             |                     |                |                  |                            |                |                     |            |                |                |         |     |         |     |    |
| 1042         | I  | NRI (GA)   | 551         | 1         | 0.181                | 1.2673                    | 33060         | 591223         | G → A    | 41277790        | 1x                          | 0.99                | 1.00           | CACGGTG          | -                          | -              | -                   | -          |                |                |         |     |         |     |    |
|              |    | NR II (AG) | 558         | 0         | 0.000                | 1.2834                    | 33480         | 598734         | -        | -               | -                           | -                   | -              | -                | -                          | -              | -                   | -          |                |                |         |     |         |     |    |
| 1290         | I  | NRI (AA)   | 278         | 0         | 0.000                | 0.6394                    | 16680         | 298572         | -        | -               | -                           | -                   | -              | -                | -                          | -              | -                   |            |                |                |         |     |         |     |    |
|              |    | NR II (GG) | 282         | 0         | 0.000                | 0.6486                    | 16920         | 302586         | -        | -               | -                           | -                   | -              | -                | -                          | -              | -                   | -          |                |                |         |     |         |     |    |
| 1087         | I  | NRI (AA)   | 283         | 0         | 0.000                | 0.6509                    | 16980         | 303942         | -        | -               | -                           | -                   | -              | -                | -                          | -              | -                   | -          |                |                |         |     |         |     |    |
|              |    | NR II (GG) | 286         | 0         | 0.000                | 0.6578                    | 17732         | 307450         | -        | -               | -                           | -                   | -              | -                | -                          | -              | -                   | -          |                |                |         |     |         |     |    |
| 1050         | I  | NRI (AA)   | 868         | 1         | 0.115                | 1.9964                    | 52080         | 930496         | C → T    | 41278301        | 1x                          | 0.91                | 1.00           | TATCTCA          | -                          | -              | -                   | -          |                |                |         |     |         |     |    |
|              |    | NR II (GG) | N/A         | N/A       | N/A                  | N/A                       | N/A           | N/A            | -        | -               | -                           | -                   | -              | -                | -                          | -              | -                   | -          |                |                |         |     |         |     |    |
| 1081         | II | NRI (TA)   | 286         | 1         | 0.350                | 0.6006                    | 16588         | 276562         | G → A    | 6361109         | 1x                          | 1.00                | 1.00           | GCCGACA          | -                          | -              | -                   | -          |                |                |         |     |         |     |    |

|              |             |          |              |               |               |                |   |   |   |   |   |   |   |   |   |
|--------------|-------------|----------|--------------|---------------|---------------|----------------|---|---|---|---|---|---|---|---|---|
| NRII (CC)    | 280         | 0        | 0.000        | 0.5880        | 15680         | 270200         | - | - | - | - | - | - | - | - | - |
| <b>TOTAL</b> | <b>3672</b> | <b>3</b> | <b>0.082</b> | <b>8.3324</b> | <b>219200</b> | <b>3879765</b> |   |   |   |   |   |   |   |   |   |

Mutations in crossover (CO) products (both reciprocals: **RI** and **RII**), and in single non-recombinants (**NRI** and **NRII**) assayed using the same experimental conditions as for crossovers, were analyzed in six Caucasian donors (aged 27-40 years). The number of sequenced single COs (#CO) and single NRs (#NR), the total amount of nucleotides sequenced (Mb), the effective sequenced sites classified as CpG or Strong (G/C), the number of *de novo* mutations identified (#mut), and the position of the mutation in the hg19 genome assembly is given for the different hotspots (HSI and HSII), located on chromosome 21 and 16, respectively. For most of the identified mutations, the 2<sup>nd</sup> PCR for CO collection was repeated multiple times and verified by sequencing again (confirming the mutation in all cases). Mutations were called by assessing the dropping factor (drop) of the chromatogram peak from the forward and reverse sequencing reads using the Mutation Surveyor software. Colored letters show the mutated nucleotide in its sequence context with green denoting a CpG site. The hotspot center was calculated according to a best-fit normal distribution (Gaussian function) of the crossover distribution (for HSI, chr21:41278510, and HSII, chr16:6361054). Symbols in the last column show the location of the mutation relative to the CO; **x** denotes the mutation is located upstream of the CO, **λ** is within the CO region, and **λx** is downstream of the CO. There was no evidence of heterogeneity in the mutation frequency among donors or reciprocals (**SI Appendix, Fig. S1**).

**Table S2. CpG methylation in sperm and testis.**

| Sample        | CpG site    |             |             |             |             |             |             |             |             |             |             | Average methylation |
|---------------|-------------|-------------|-------------|-------------|-------------|-------------|-------------|-------------|-------------|-------------|-------------|---------------------|
|               | #1          | #2          | #3          | #4          | #5          | #6          | #7          | #8          | #9          | #10         | #11         |                     |
| <b>1042</b>   | 0.95        | 0.95        | 0.87        | 0.94        | 0.84        | 0.81        | 1.00        | 0.90        | 0.79        | 0.80        | 0.87        |                     |
| <b>1050</b>   | 0.96        | 0.92        | 0.90        | 0.99        | 0.72        | 0.88        | 0.99        | -           | 0.85        | 0.80        | 0.83        | <b>88%</b>          |
| <b>TOTAL</b>  | <b>0.96</b> | <b>0.93</b> | <b>0.89</b> | <b>0.96</b> | <b>0.78</b> | <b>0.85</b> | <b>1.00</b> | <b>0.90</b> | <b>0.82</b> | <b>0.80</b> | <b>0.85</b> |                     |
| <b>Testis</b> | 0.95        | 0.95        | 0.88        | 0.94        | 0.74        | 0.80        | 0.87        | 0.81        | 0.71        | 0.70        | 0.83        | <b>83%</b>          |

CpG methylation levels were analyzed using bisulfite sequencing for 11 CpG sites of HSI lying within three regions, 218 bp, 156 bp, and 392 bp in size, distributed over the hotspot. The center of these regions is 359 bp, -21 bp, and 85 bp from the hotspot center, respectively. Sperm DNA of two donors (1042 and 1050) and DNA from one testis biopsy of a different Caucasian donor were analyzed. Percent methylation was estimated with the Mutation Surveyor software via the analysis of the dropping factor of the chromatograms obtained from amplicons after bisulfite treatments. Sperm DNA showed an average methylation level of 88% summed over all analyzed sites, the mean methylation level in testis DNA is 83%.

**Table S3. Transmission bias of haplotypes.**

| Donor | SNP        | RI                  | RII                 | SNP_RI | SNP_RII | nRI    | nRII   | %GC |     | Distance to HS center (bp) | chi-square residuals        |                 |                             |  |
|-------|------------|---------------------|---------------------|--------|---------|--------|--------|-----|-----|----------------------------|-----------------------------|-----------------|-----------------------------|--|
|       |            |                     |                     |        |         |        |        | RI  | RII |                            | RI vs RII                   | strong vs. weak |                             |  |
| 1042  | rs2244084  | Aag*tcgaG           | <b>Ggt*caagA</b>    | A      | G       | 92213  | 152560 |     |     |                            |                             |                 |                             |  |
| 1042  | rs2299762  | <b>G</b> ag*tcgaG   | A <b>gt*caagA</b>   | a      | g       | 1      | 3      | 63% | 38% | -810                       | -0.80                       | 1.29            |                             |  |
| 1042  | rs2299765  | <b>Gg</b> g*tcgaG   | Aa <b>t*caagA</b>   | g      | t       | 16     | 9      | 75% | 25% | -665                       | 3.72*                       | 3.48*           |                             |  |
| 1042  | rs2244287  | <b>Ggt</b> *tcgaG   | Aag <b>*caagA</b>   | t      | c       | 536    | 760    | 63% | 38% | 419                        | -2.44                       | -2.49           |                             |  |
| 1042  | rs968582   | <b>Ggt*c</b> cgaG   | Aag*t <b>aagA</b>   | c      | a       | 13     | 4      | 75% | 25% | 445                        | <b>5.93*</b>                | <b>5.68*</b>    |                             |  |
| 1042  | rs2244297  | <b>Ggt*ca</b> gaG   | Aag*tc <b>agA</b>   | g      | a       | 29     | 40     | 63% | 38% | 599                        | -0.01                       | -0.30           |                             |  |
| 1042  | rs2299767  | <b>Ggt*caa</b> aG   | Aag*tcg <b>gA</b>   | a      | g       | 4      | 6      | 50% | 50% | 1073                       | -0.17                       | 0.08            |                             |  |
| 1042  | rs2299774  | <b>Ggt*caag</b> G   | Aag*tcga <b>A</b>   | G      | A       | 2      | 5      | 63% | 38% | 2254                       | -0.86                       | -0.94           |                             |  |
|       |            |                     |                     |        |         |        |        |     |     |                            | $\chi^2 = 50.6, p = 0.0005$ |                 | $\chi^2 = 47.3, p = 0.0005$ |  |
| 1290  | rs2244084  | Gggtt*tcgaG         | <b>Aaacg*caatA</b>  | G      | A       | 157935 | 187564 |     |     |                            |                             |                 |                             |  |
| 1290  | 760        | <b>A</b> ggtt*tcgaG | G <b>aacg*caatA</b> | g      | a       | 3      | 1      | 50% | 40% | -817                       | 1.97                        | 1.99            |                             |  |
| 1290  | rs2299762  | <b>Aa</b> gtt*tcgaG | Gg <b>acg*caatA</b> | g      | a       | 0      | 0      | 40% | 50% | -810                       | -                           | -               |                             |  |
| 1290  | rs2299763  | <b>Aaa</b> tt*tcgaG | Ggg <b>cg*caatA</b> | t      | c       | 2      | 4      | 30% | 60% | -721                       | -1.03                       | 1.47            |                             |  |
| 1290  | rs2299765  | <b>Aaac</b> t*tcgaG | Gggt <b>*caatA</b>  | t      | g       | 1      | 1      | 40% | 50% | -665                       | -0.02                       | 0.03            |                             |  |
| 1290  | rs2244287  | <b>Aaacg</b> *tcgaG | Gggtt <b>*caatA</b> | t      | c       | 531    | 515    | 50% | 40% | 419                        | 1.27                        | -0.36           |                             |  |
| 1290  | rs968582   | <b>Aaacg*c</b> cgaG | Gggtt*t <b>aatA</b> | c      | a       | 7      | 5      | 60% | 30% | 445                        | 0.86                        | 0.88            |                             |  |
| 1290  | rs2244297  | <b>Aaacg*ca</b> gaG | Gggtt*tc <b>atA</b> | g      | a       | 15     | 16     | 50% | 40% | 599                        | -0.32                       | -0.28           |                             |  |
| 1290  | rs2299768  | <b>Aaacg*caa</b> aG | Gggtt*tcg <b>tA</b> | a      | t       | 1      | 6      | 40% | 50% | 1177                       | -2.08                       | -               |                             |  |
| 1290  | rs2299774  | <b>Aaacg*caat</b> G | Gggtt*tcga <b>A</b> | G      | A       | 2      | 5      | 40% | 50% | 2254                       | -1.37                       | -1.36           |                             |  |
|       |            |                     |                     |        |         |        |        |     |     |                            | $\chi^2 = 12.0, p = 0.0975$ |                 | $\chi^2 = 8.80, p = 0.182$  |  |
| 1087  | rs2244084  | Ggaca*aG            | <b>AagtcA</b>       | G      | A       | 106990 | 109886 |     |     |                            |                             |                 |                             |  |
| 1087  | rs2299762  | <b>A</b> gaca*aG    | G <b>agtc*tA</b>    | g      | a       | 7      | 3      | 43% | 43% | -810                       | 2.36                        | 2.19            |                             |  |
| 1087  | rs2244188  | <b>Aa</b> aca*aG    | Gg <b>gtc*tA</b>    | a      | g       | 154    | 153    | 29% | 57% | -266                       | 0.30                        | -2.85           |                             |  |
| 1087  | rs2244189  | <b>Aag</b> ca*aG    | Gga <b>tc*tA</b>    | c      | t       | 14     | 13     | 43% | 43% | -208                       | 0.33                        | 0.11            |                             |  |
| 1087  | rs62236567 | <b>Aagt</b> a*aG    | Ggac <b>c*tA</b>    | a      | c       | 4      | 14     | 29% | 57% | -169                       | <b>-2.68</b>                | <b>4.67*</b>    |                             |  |
| 1087  | rs2299768  | <b>Aagtc</b> *aG    | Ggaca <b>*tA</b>    | a      | t       | 323    | 325    | 43% | 43% | 1177                       | 0.23                        | -               |                             |  |
| 1087  | rs2299774  | <b>Aagtc*t</b> G    | Ggaca*a <b>A</b>    | G      | A       | 1      | 2      | 43% | 43% | 2254                       | -0.69                       | -0.76           |                             |  |
|       |            |                     |                     |        |         |        |        |     |     |                            | $\chi^2 = 13.2, p = 0.0310$ |                 | $\chi^2 = 28.1, p = 0.0005$ |  |
| 1050  | rs2244084  | Ggttc*G             | <b>Aacgt*A</b>      | G      | A       | 87508  | 70268  |     |     |                            |                             |                 |                             |  |
| 1050  | rs2299762  | <b>A</b> gttc*G     | G <b>acgt*A</b>     | g      | a       | 5      | 2      | 50% | 50% | -810                       | 2.08                        | 2.04            |                             |  |
| 1050  | rs2299763  | <b>Aa</b> ttc*G     | Gg <b>cgt*A</b>     | t      | c       | 5      | 9      | 33% | 67% | -721                       | -1.39                       | 1.80            |                             |  |
| 1050  | rs2299765  | <b>Aac</b> tc*G     | Ggt <b>gt*A</b>     | t      | g       | 3      | 4      | 50% | 50% | -665                       | -0.53                       | 0.58            |                             |  |
| 1050  | rs2244189  | <b>Aacg</b> c*G     | Ggtt <b>t*A</b>     | c      | t       | 180    | 142    | 67% | 33% | -208                       | <b>3.41*</b>                | 3.14*           |                             |  |
| 1050  | rs2299774  | <b>Aacgt</b> *G     | Ggttc <b>*A</b>     | G      | A       | 378    | 404    | 50% | 50% | 2254                       | -3.10*                      | <b>-3.81*</b>   |                             |  |
|       |            |                     |                     |        |         |        |        |     |     |                            | $\chi^2 = 17.9, p = 0.0045$ |                 | $\chi^2 = 18.9, p = 0.003$  |  |
| 7023  | rs2244084  | Ggct*atcgaG         | <b>Aatc*gcaagA</b>  | G      | A       | 81309  | 49958  |     |     |                            |                             |                 |                             |  |
| 7023  | rs2299762  | <b>A</b> gct*atcgaG | G <b>atc*gcaagA</b> | g      | a       | 2      | 0      | 50% | 50% |                            | -                           | -               |                             |  |



|      |             |                                      |                             |     |     |        |        |     |     |      |                             |                              |
|------|-------------|--------------------------------------|-----------------------------|-----|-----|--------|--------|-----|-----|------|-----------------------------|------------------------------|
| 7023 | 711         | <b>Aa</b> <u>ct</u> *atcgaG          | Gg <b>tc</b> *gcaagA        | c   | t   | 36     | 11     | 40% | 60% | -589 | 3.35*                       | 2.14                         |
| 7023 | rs2244189   | <b>Aat</b> <u>t</u> *atcgaG          | Ggc <b>c</b> *gcaagA        | t   | c   | 129    | 88     | 30% | 70% | -208 | -3.65*                      | 0.70                         |
| 7023 | rs2299766   | <b>Aatc</b> *atcgaG                  | Ggct *gcaagA                | a   | g   | 188    | 109    | 40% | 60% | 184  | -1.79                       | -1.27                        |
| 7023 | rs2244287   | <b>Aatc</b> *g <u>tc</u> gaG         | Ggct*a <b>ca</b> agA        | t   | c   | 108    | 48     | 50% | 50% | 419  | 1.89                        | -2.84                        |
| 7023 | rs968582    | <b>Aatc</b> *g <b>c</b> <u>cg</u> aG | Ggct*at <b>ag</b> A         | c   | a   | 9      | 5      | 60% | 40% | 445  | -0.18                       | -0.79                        |
| 7023 | rs2244297   | <b>Aatc</b> *g <b>ca</b> <u>ga</u> G | Ggct*atc <b>ag</b> A        | g   | a   | 26     | 7      | 50% | 50% | 599  | 3.51*                       | 2.47                         |
| 7023 | rs2299767   | <b>Aatc</b> *g <b>caa</b> <u>a</u> G | Ggct*atcg <b>g</b> A        | a   | g   | 5      | 1      | 40% | 60% | 1073 | 2.24                        | -1.23                        |
| 7023 | rs2299774   | <b>Aatc</b> *g <b>caag</b> <u>G</u>  | Ggct*atcga <b>A</b>         | G   | A   | 16     | 2      | 50% | 50% | 2254 | <b>6.26*</b>                | <b>5.30*</b>                 |
|      |             |                                      |                             |     |     |        |        |     |     |      | $\chi^2 = 80.5, p = 0.0005$ | $\chi^2 = 47.6, p = 0.0005$  |
| 1081 | rs1861187   | <u>C</u> _aaa*ttC                    | <b>Tagcg</b> *ccA           | C   | T   | 396479 | 379875 |     |     |      |                             |                              |
| 1081 | rs35094442  | <b>T</b> _aaa*ttC                    | <u>C</u> <b>agcg</b> *ccA   | del | ins | 17     | 55     | 13% | 75% | -487 | <b>-5.26*</b>               | -                            |
| 1081 | rs12102448  | <b>Ta</b> _aaa*ttC                   | <u>C</u> _g <b>cg</b> *ccA  | a   | g   | 36     | 26     | 13% | 75% | -280 | 2.53                        | -1.37                        |
| 1081 | rs12102452  | <b>Tag</b> _aa*ttC                   | <u>C</u> _a <b>cg</b> *ccA  | a   | c   | 44     | 47     | 25% | 63% | -167 | 0.07                        | 1.07                         |
| 1081 | rs199937311 | <b>Tagc</b> _a*ttC                   | <u>C</u> _aa <b>g</b> *ccA  | a   | g   | 1      | 2      | 38% | 50% | -132 | -0.63                       | 1.12                         |
| 1081 | rs12445929  | <b>Tagcg</b> *_ttC                   | <u>C</u> _aaa * <b>cg</b> A | t   | c   | 180    | 168    | 50% | 38% | 854  | 2.92                        | 0.17                         |
| 1081 | rs8060928   | <b>Tagcg</b> *c <u>t</u> C           | <u>C</u> _aaa*t <b>c</b> A  | t   | c   | 0      | 0      | 63% | 25% | -    | -                           | -                            |
| 1081 | rs4786855   | <b>Tagcg</b> *cc <u>C</u>            | <u>C</u> _aaa*tt <b>A</b>   | C   | A   | 2      | 4      | 63% | 13% | 1302 | -0.89                       | -0.67                        |
|      |             |                                      |                             |     |     |        |        |     |     |      | $\chi^2 = 33.5, p = 0.0005$ | $\chi^2 = 4.27, p = 0.352$   |
|      |             |                                      |                             |     |     |        |        |     |     |      | $\chi^2 = 47.6, p = 0.0005$ | $\chi^2 = 207.6, p = 0.0005$ |

Crossover haplotypes measured in the six donors for both reciprocals. Asterisks within the haplotype denote the hotspot center and the underlined position corresponds to the reported SNP. The respective numbers of haplotypes (nRI or nRII) are given for the six assayed donors. The first row for each donor denotes the non-recombinant haplotype and the number of amplifiable meioses. The GC content is estimated as the proportion of GC (S) alleles of the heterozygous alleles of that haplotype. The HS center was calculated according to a best-fit normal distribution (Gaussian function) of the crossover distribution (for HSI, at chr21:41278510, and HSII, at chr16:6361054). For each donor, we used the chi-square test to examine the data for transmission biases. The null hypothesis predicts equal transmission for both alleles; we therefore calculated the expected number of haplotypes with RI or strong alleles based on the transmission rate of the RII or weak allele haplotype and vice versa (*i.e.*,  $\text{expected\_RI} = \text{nRII} \cdot \text{totalRI} / \text{totalRII}$ ; where total denotes the sum of all crossovers collected per reciprocal for that donor). We tested for deviation from expected values, for each donor and overall, using chi-square tests; *p* values were obtained by simulations under the null hypothesis of equal transmission (2000 iterations), as there were small expected count numbers for some entries. The standardized Pearson residual chi-square values are given for each site, with values above zero indicating an excess of the haplotype containing the RI, and those below indicating excess RII; we considered cells with absolute chi-square residual values larger than 3 (marked with an asterisk) to have significantly unequal transmission (with  $p < 0.003$ ). Haplotypes that have the strongest evidence of heterogeneity are marked in bold.

**Table S4. Complex crossovers (CCO).**

| Donor            | HS                    | Recipr.      | # COs               | Mb           | # CCOs       | CCO/CO (%)   | 95% Poisson CI (%) |              | Samples with CCO type | Possible HTs            | Converted SNP | Type   | Distance to HS Center | Distance to CO (bp) | cM/Mb | CO region size (bp) | Difference RI and RII (p-value) |
|------------------|-----------------------|--------------|---------------------|--------------|--------------|--------------|--------------------|--------------|-----------------------|-------------------------|---------------|--------|-----------------------|---------------------|-------|---------------------|---------------------------------|
|                  |                       |              |                     |              |              |              | lower              | upper        |                       |                         |               |        |                       |                     |       |                     |                                 |
| 1042             | I                     | RI (GG)      | 602                 | 1.38         | 1            | 0.166        | 0.004              | 0.926        | 1                     | C-G-g-t-t-c-g-g-G-G     | rs2299767     | A → G  | 1073                  | ~ 1197              | 222.8 | 1084                | 0.748                           |
|                  |                       | RII (AA)     | 834                 | 1.92         | 7            | 0.839        | 0.337              | 1.729        | 2                     | A-A-g-g-c-a-a-g-A-A     | rs2299765     | T → G  | -665                  | ~ 470               | 1.3   | 651                 |                                 |
|                  |                       |              |                     |              |              |              |                    |              | 2                     | A-A-g-g-c-a-a-g-A-A     | rs2299762     | A → G  | -810                  | ~ - 687             | 190.9 | 1084                |                                 |
|                  |                       |              |                     |              |              |              |                    |              | 3                     | A-A-a-g-c-c-a-g-A-A     | rs968582      | T → C  | 450                   | ~ 568               | 190.9 | 1084                |                                 |
|                  |                       |              |                     |              |              |              |                    |              | 3                     | A-A-a-g-c-c-a-g-A-A     | rs2244287     | A → C  | 424                   | ~ - 103             | 70.7  | 154                 |                                 |
|                  |                       |              |                     |              |              |              |                    |              | 1                     | A-A-a-g-c-c-g-a-A-A     | rs2244287     | T → C  | 419                   | ~ - 1248            | 1.2   | 1181                |                                 |
|                  |                       | 1            | A-A-a-g-t-a-g-g-A-A | rs2244297    | A → G        | 599          | ~ 167              | 41.9         | 26                    |                         |               |        |                       |                     |       |                     |                                 |
| 1                | A-A-a-g-t-a-g-g-A-A   | rs968582     | C → A               | 445          | ~ - 3913     | 3.4          | 474                |              |                       |                         |               |        |                       |                     |       |                     |                                 |
| <b>total</b>     | <b>1436</b>           | <b>3.3</b>   | <b>8</b>            | <b>0.557</b> | <b>0.241</b> | <b>1.098</b> |                    |              |                       |                         |               |        |                       |                     |       |                     |                                 |
| 1290             | I                     | RI (AG)      | 562                 | 1.29         | 0            | 0.000        | 0.000              | 0.656        | -                     | -                       | -             | -      | -                     | -                   | -     | -                   | 0.092                           |
|                  |                       | RII (GA)     | 560                 | 1.29         | 7            | 1.250        | 0.503              | 2.575        | 4                     | C-G-g-g-t-t-c-c-a-t-A-A | rs968582      | A → C  | 450                   | ~ 568               | 129.8 | 1084                |                                 |
|                  |                       |              |                     |              |              |              |                    |              | 4                     | C-G-g-g-t-t-c-c-a-t-A-A | rs2244287     | T → C  | 424                   | ~ - 103             | 28.4  | 154                 |                                 |
|                  |                       |              |                     |              |              |              |                    |              | 2                     | C-G-g-g-c-t-c-a-a-t-A-A | rs2299765     | G → T  | -665                  | ~101                | 12.3  | 89                  |                                 |
|                  |                       |              |                     |              |              |              |                    |              | 2                     | C-G-g-g-c-t-c-a-a-t-A-A | rs2299763     | T → C  | -721                  | ~ -598              | 129.8 | 1084                |                                 |
|                  |                       |              |                     |              |              |              |                    |              | 1                     | C-G-g-g-t-t-a-g-t-A-A   | rs2244297     | A → G  | 599                   | ~167                | 52.6  | 26                  |                                 |
| 1                | C-G-g-g-t-t-a-g-t-A-A | rs968582     | C → A               | 445          | ~ -443       | 2.8          | 578                |              |                       |                         |               |        |                       |                     |       |                     |                                 |
| <b>total</b>     | <b>1122</b>           | <b>2.58</b>  | <b>7</b>            | <b>0.624</b> | <b>0.251</b> | <b>1.285</b> |                    |              |                       |                         |               |        |                       |                     |       |                     |                                 |
| 1087             | I                     | RI (AG)      | 504                 | 1.16         | 1            | 0.198        | 0.005              | 1.105        | 1                     | A-A-a-g-c-c-a-G-G       | rs62236567    | A → C  | -169                  | ~ 68                | 107.1 | 58                  | 1                               |
|                  |                       | RII (GA)     | 510                 | 1.17         | 0            | 0.000        | 0.000              | 0.723        | -                     | -                       | -             | -      | -                     | -                   | -     |                     |                                 |
|                  |                       | <b>total</b> | <b>1014</b>         | <b>2.33</b>  | <b>1</b>     | <b>0.099</b> | <b>0.002</b>       | <b>0.549</b> |                       |                         |               |        |                       |                     |       |                     |                                 |
| 1050             | I                     | RI (AG)      | 571                 | 1.31         | 0            | 0.000        | 0.000              | 0.646        | -                     | -                       | -             | -      | -                     | -                   | -     | -                   | 1                               |
|                  |                       | RII (GA)     | 562                 | 1.29         | 1            | 0.178        | 0.005              | 0.991        | 1                     | C-G-g-c-t-t-A-A         | rs2299765     | G → T  | -665                  | ~ 100               | 59.7  | 89                  |                                 |
|                  |                       |              |                     |              |              |              |                    |              | 1                     | C-G-g-c-t-t-A-A         | rs2299763     | T → C  | -721                  | ~ - 285             | 183.6 | 457                 |                                 |
| <b>total</b>     | <b>1133</b>           | <b>2.61</b>  | <b>1</b>            | <b>0.088</b> | <b>0.002</b> | <b>0.492</b> |                    |              |                       |                         |               |        |                       |                     |       |                     |                                 |
| 7023             | I                     | RI (AG)      | 520                 | 1.2          | 1            | 0.192        | 0.005              | 1.071        | 1                     | A-A-a-c-c-a-t-c-g-a-G-G | rs2244189     | T → CT | -208                  | ~ 487               | 74.7  | 231                 | 1                               |
|                  |                       | RII (GA)     | 272                 | 0.63         | 1            | 0.368        | 0.009              | 2.048        | 1                     | A-A-a-c-c-a-t-c-g-a-G-G | 711           | → C    | -579                  | ~ - 567             | 256.8 | 392                 |                                 |
|                  |                       | RII (GA)     | 272                 | 0.63         | 1            | 0.368        | 0.009              | 2.048        | 1                     | C-G-g-c-t-a-c-c-a-g-A-A | rs968582      | A → C  | 445                   | ~ 144               | 180.9 | 235                 |                                 |
|                  |                       |              |                     |              |              |              |                    |              | 1                     | C-G-g-c-t-a-c-c-a-g-A-A | rs2244287     | T → C  | 419                   | ~ - 103             | 40.3  | 154                 |                                 |
| <b>total</b>     | <b>792</b>            | <b>1.82</b>  | <b>2</b>            | <b>0.253</b> | <b>0.031</b> | <b>0.912</b> |                    |              |                       |                         |               |        |                       |                     |       |                     |                                 |
| <b>total HSI</b> |                       | <b>5497</b>  | <b>12.6</b>         | <b>19</b>    | <b>0.346</b> | <b>0.208</b> | <b>0.540</b>       |              |                       |                         |               |        |                       |                     |       |                     |                                 |

|                         |          |         |             |             |           |              |              |              |                                     |                                             |            |       |       |        |      |      |   |
|-------------------------|----------|---------|-------------|-------------|-----------|--------------|--------------|--------------|-------------------------------------|---------------------------------------------|------------|-------|-------|--------|------|------|---|
| 1081                    | II       | RI (TC) | 282         | 0.59        | 2         | 0.709        | 0.086        | 2.562        | 2                                   | <b>C-T</b> - <u>-g-a-a-t-t</u> - <b>C-A</b> | rs12102448 | A → G | -280  | ~ 952  | 2.4  | 1490 | 1 |
|                         |          |         |             |             |           |              |              |              |                                     | <b>C-T</b> - <u>-g-a-a-t-t</u> - <b>C-A</b> | rs35094442 | A → _ | -487  | ~ -264 | 82.5 | 113  |   |
|                         | RII (CA) | 306     | 0.64        | 4           | 1.307     | 0.356        | 3.374        | 4            | <b>G-C</b> -a-a-c-g-c-c- <b>A-G</b> | rs12102448                                  | G → A      | -280  | ~ 952 | 8.1    | 1490 |      |   |
|                         |          |         |             |             |           |              |              |              |                                     | <b>G-C</b> -a-a-c-g-c-c- <b>A-G</b>         | rs35094442 | _ → A | -487  | ~ -264 | 91.8 | 113  |   |
| <b>total HSII</b>       |          |         | <b>588</b>  | <b>1.23</b> | <b>6</b>  | <b>1.020</b> | <b>0.374</b> | <b>2.221</b> |                                     |                                             |            |       |       |        |      |      |   |
| <b>TOTAL HSI + HSII</b> |          |         | <b>6085</b> | <b>13.9</b> | <b>25</b> | <b>0.411</b> | <b>0.266</b> | <b>0.606</b> |                                     |                                             |            |       |       |        |      |      |   |

CCOs in both reciprocals (RI and RII) were analyzed in five different donors for HSI and in one donor for HSII. For most CCOs, there are two different possibilities for the location of the conversion, so both possible haplotypes (HTs) are shown. The change in color (black-red) indicates the location of the COs, green letters show the converted SNP. The hotspot center was calculated according to a best-fit normal distribution (Gaussian function) of the crossover distribution (for HSI, near chr21:41278510, and HSII, near chr16: 6361054). Differences in CCO frequency between RI and RII were tested for significance using the Fisher's exact test with Bonferonni multiple-testing correction.

**Table S5. Crossover frequencies in HSI and HSII.**

| Donor            | Age | HS       | #CO         | Meioses          | Correction factors | Amplifiable meioses | bp          | cM/Mb        | CO_freq<br>( $\times 10^{-3}$ ) | CI for CO_freq<br>( $\times 10^{-3}$ ) |             |
|------------------|-----|----------|-------------|------------------|--------------------|---------------------|-------------|--------------|---------------------------------|----------------------------------------|-------------|
|                  |     |          |             |                  |                    |                     |             |              |                                 | upper                                  | lower       |
| 1042             | 40  | I        | 1428        | 1,178,300        | 0.208              | 244,773             | 3761        | 620.5        | 11.67                           | 12.29                                  | 11.07       |
| 1290             | 35  | I        | 1115        | 1,348,000        | 0.256              | 345,499             | 3761        | 343.2        | 6.45                            | 6.84                                   | 6.08        |
| 1087             | 34  | I        | 1014        | 913,800          | 0.237              | 216,876             | 3761        | 497.3        | 9.35                            | 9.94                                   | 8.78        |
| 1050             | 37  | I        | 1132        | 760,050          | 0.208              | 157,777             | 3761        | 763.1        | 14.35                           | 15.21                                  | 13.53       |
| 7023             | 29  | I        | 790         | 593,300          | 0.221              | 131,267             | 3761        | 640.1        | 12.04                           | 12.91                                  | 11.21       |
| <b>HSI total</b> |     | <b>I</b> | <b>5479</b> | <b>4,793,450</b> | <b>0.221</b>       | <b>1,096,193</b>    | <b>3761</b> | <b>531.6</b> | <b>10.00</b>                    | <b>10.26</b>                           | <b>9.73</b> |
| 1081             | 27  | II       | 582         | 1,851,600        | 0.419              | 776,355             | 3326        | 90.2         | 1.50                            | 1.63                                   | 1.38        |
| <b>Total</b>     |     |          | <b>6061</b> | <b>6,645,050</b> |                    | <b>1,872,548</b>    |             | <b>310.9</b> | <b>6.47</b>                     | <b>6.64</b>                            | <b>6.31</b> |

Estimates are based on the number of amplifiable meiosis, which is the number of measured sperm genomes multiplied by correction factors derived from the non-recombinant controls (Materials and Methods). For donor 7023, the number of amplifiable meiosis was determined using the average correction factor of the 4 other donors in HSI. The crossover frequency is measured as the number of crossovers (#CO) measured per number of amplifiable meiosis per length of the hotspot, expressed in centiMorgans per megabase (cM/Mb) or crossovers per amplifiable meiosis (CO\_freq). Total numbers are expressed as the sum of crossovers or meiosis, total cM/Mb as averages of total cM/Mb calculated per hotspot, and total CO\_freq as twice the ratio of total CO per total amplifiable meiosis (accounting for the fact that only one of the reciprocals was measured per reaction).

**Table S6. Primers and annealing temperatures used for genotyping.**

| SNP            | Forward primer |                                     | Reverse primer |                                       | T <sub>M</sub> [°C] | Polymerase |
|----------------|----------------|-------------------------------------|----------------|---------------------------------------|---------------------|------------|
|                | Primer name    | Primer sequence                     | Primer name    | Primer sequence                       |                     |            |
| rs6517577 A/C  | F-6517577      | CTC AAT AGT CCA CATGGA AAC tta(a/c) | OR-6517577     | TGA CAT TTC TGA CACACG TT             | 62                  | Phusion    |
| rs2244084 A/G  | F-2244084      | AGAATCCACCATAGTGAGAGATagc(a/g)      | OR-2244084     | CCCATGTGCCTCTGGTATTC                  | 68                  | Phusion    |
| rs2299762 A/G  | OF-2299762     | GCA AGG AAC ACC TCG GAT AA          | R-2299762      | TTA CAG ACA TGA TCC Accg(t/c)         | 60                  | Phusion    |
| rs2244188 A/G  | OF2244188      | CCTCTTGACCAGGGTCTTGT                | R2244188       | GCTAAGATGTAGCCCATTaac(t/c)            | 64                  | OneTaq     |
| rs2244189 C/T  | OF-2244189     | GGGCTACATCTTAGCCAAACC               | R-2244189      | CCAGAGGCTAGTTAACTAAACTGatg(g/a)       | 66                  | OneTaq     |
| rs2299766 A/G  | F-2299766      | CCGC TAC ATT ATT CTCAAT GAatt(a/g)  | OR-2299766     | TGAAACATTTGAAACCTGGAATA               | 59                  | OneTaq     |
| rs2244287 C/T  | OF-2244287     | CCGCTTGAAAACACTTTTGC                | R-2244287      | CTGCTTCTGAAAACACTGcct(g/a)            | 66                  | OneTaq     |
| rs968582 A/C   | F-968582       | CAG TTT TTC AGA AGC AAA Accc(a/c)   | OR-968582      | GAGGACAATTCAGCCCACTC                  | 57                  | Phusion    |
| rs2244297 A/G  | OF-2244297     | GTACATCTGGGATTACAAAAGCA             | R-2244297      | GCTTGAGAGGGAGATCTACTct(t/c)           | 62                  | OneTaq     |
| rs2299767 A/G  | F-2299767      | GGGAATACAAAAATTATCTGggc(a/g)        | OR-2299767     | AGT TTT GGC TGG GAA AGT CC            | 60                  | OneTaq     |
| rs2299774 A/G  | OF-2299774     | AGGTCTCAGAGGAGAGGCTAA               | R-2299774      | AAA GCA GAT TGG CTCCTtgg(t/c)         | 68                  | Phusion    |
| rs2299775 A/G  | OF-2299775     | GCA GGA TCA GCT GCTTAA AA           | R-2299775      | AGC AAT TCC CCT GGTTGtgt(t/c)         | 68                  | Phusion    |
| rs7201177 C/G  | F-7201177      | TAG GAC GTC TCT CTG ctt(c/g)        | OR-7201177     | CT GGG TAT AGG GTG AGA GGA            | 63                  | OneTaq     |
| rs1861187 C/T  | F-1861187      | GCG ATT GAA ATA ATC AGG Tctca(c/t)  | OR-1861187     | GAA TTC AAA ACA GGC GAA CG            | 63                  | OneTaq     |
| rs4786855 A/C  | OF-4786855     | CCA GGA AGA ACC AGC ATT TC          | R-4786855      | GAA GTA GCA ATG AGA GAG AGA Agaa(t/g) | 63                  | OneTaq     |
| rs12149730 A/G | OF-12149730    | AAG TGT GCC TTG CAA ATT CC          | R-12149730     | GTA AGT GCT ATG TTC AGA ACaga(t/c)    | 63                  | OneTaq     |

Allele-specific primers (phosphorothioate bonds are indicated in lower case), outer primers (OF = outer forward, OR = outer reverse), and the annealing temperatures used are listed. Two alternative versions of each allele-specific primer were used, one for each allele (letters in brackets).

**Table S7. Sequencing primers.**

| Name              | HS | Primer sequence        |
|-------------------|----|------------------------|
| HSInt15-Reg1-fwd  | I  | CTTCTGATATTGATCCAGATG  |
| HSInt15-Reg2-fwd  | I  | CTGGTGAACCTCAGGATTGTC  |
| HSInt15-Reg3-fwd  | I  | CAAGCAGGAGATATTCCAGG   |
| HSInt15-Reg1-rev  | I  | GCTAAGATGTAGCCCATTAAAC |
| HSInt15-Reg2-rev  | I  | GAGGACAATTCAGCCCACTC   |
| HSInt15-Reg3-2rev | I  | TGTCTGCTCACCTCAATCTCC  |
| HSInt15-Reg3-3rev | I  | CTCCACCTAATCATTGCTCT   |
| HSII-Reg1-fwd     | II | GAGGAGCTGGGAATATAGGTG  |
| HSII-Reg1-rev     | II | GCACTGTTCTTCATAGCTTC   |
| HSII-Reg2-fwd     | II | AACAGAATCCCAGACATAGG   |
| HSII-Reg3-fwd     | II | GCAAAAGGAGATGATGTTGG   |
| HSII-Reg3-rev     | II | TTTGAATGGATTCTGTTGC    |

Sequences of primers used for forward (fwd) and reverse (rev) Sanger sequencing of the three analyzed regions of HSI and HSII are shown in the table below. When a mutation was detected in a read in one direction (the first three primers listed for each HS), sequencing was repeated in the opposite direction

**Table S8. Primers for CpG methylation analysis.**

| Name      | Primer sequence                           | Product length | CpG      |
|-----------|-------------------------------------------|----------------|----------|
| F-Region1 | TGG TTT AGT TTG AGA TTT AGG               | 218 bp         | #1 + #2  |
| R-Region1 | ACC TTT AAA AAC CTA CCC C                 |                |          |
| F-Region2 | <b>g</b> GA AGG AAG AAA AGG ATG AAA GG    | 156 bp         | #3 + #4  |
| R-Region2 | AAC CTC TTC ATA TTT CAC CTA CCC           |                |          |
| F-Region3 | <b>ccg</b> GGA GTT TTA TTA TGT TGG TTA GG | 392 bp         | #5 - #11 |
| R-Region3 | <b>ggc</b> AAA AAT CAA CCT TAC AAC CC     |                |          |

Primers used in the amplification of bisulfite converted DNA for the methylation analysis of 11 CpG sites lying in Region 1 (41278760-41278977), Region 2 (41278412-41278566) and Region 3 (41279164-41279549) (GRCh37/hg19). Red letters indicate additional bases in the primer sequences in order to increase the annealing temperature.

**Table S9. gBGC analysis.**

| Donor | HS | SNP        | U/D from DSB | RI(p)       | nRI (p) | S/W (p) | RI(d)         | nRI (d) | S/W (d) | RII(p)        | nRII (p) | S/W (p) | RII(d)       | nRII (d) | S/W (d) | S(p) | S(d) | W(p) | W_d |
|-------|----|------------|--------------|-------------|---------|---------|---------------|---------|---------|---------------|----------|---------|--------------|----------|---------|------|------|------|-----|
| 1042  | I  | rs2299762  | U            | Ggg*tcgaG   | 16      | S       | Gag*tcgaG     | 1       | W       | Aat*caagA     | 9        | W       | Agt*caagA    | 3        | S       | 16   | 3    | 9    | 1   |
| 1042  | I  | rs2299765  | U            | Ggt*tcgaG   | 536     | W       | Ggg*tcgaG     | 16      | S       | Aag*caagA     | 760      | S       | Aat*caagA    | 9        | W       | 760  | 16   | 536  | 9   |
| 1042  | I  | rs2244287  | D            | Ggt*tcgaG   | 536     | W       | Ggt*ccgaG     | 13      | S       | Aag*caagA     | 760      | S       | Aag*taagA    | 4        | W       | 760  | 13   | 536  | 4   |
| 1042  | I  | rs968582   | D            | Ggt*ccgaG   | 13      | S       | Ggt*cagaG     | 29      | W       | Aag*taagA     | 4        | W       | Aag*tcagA    | 40       | S       | 13   | 40   | 4    | 29  |
| 1042  | I  | rs2244297  | D            | Ggt*cagaG   | 29      | S       | Ggt*caaG      | 4       | W       | Aag*tcagA     | 40       | W       | Aag*tcggA    | 6        | S       | 29   | 6    | 40   | 4   |
| 1042  | I  | rs2299767  | D            | Ggt*caaG    | 4       | W       | Ggt*caagG     | 2       | S       | Aag*tcggA     | 6        | S       | Aag*tcgaA    | 5        | W       | 6    | 2    | 4    | 5   |
| 1042  | I  | rs2299774  | D            | N/A         | N/A     | N/A     | N/A           | N/A     | N/A     | N/A           | N/A      | N/A     | <NA          | NA       | NA      | N/A  | N/A  | N/A  | N/A |
| 1050  | I  | rs2299762  | U            | Aattc*G     | 5       | W       | Agttc*G       | 5       | S       | Ggctc*A       | 9        | S       | Gagct*A      | 2        | W       | 9    | 5    | 5    | 2   |
| 1050  | I  | rs2299763  | U            | Aactc*G     | 3       | S       | Aattc*G       | 5       | W       | Ggtgt*A       | 4        | W       | Ggctc*A      | 9        | S       | 3    | 9    | 4    | 5   |
| 1050  | I  | rs2299765  | U            | Aacgc*G     | 180     | S       | Aactc*G       | 3       | W       | Ggttt*A       | 142      | W       | Ggtgt*A      | 4        | S       | 180  | 4    | 142  | 3   |
| 1050  | I  | rs2244189  | U            | Aacgt*G     | 378     | W       | Aacgc*G       | 180     | S       | Ggttc*A       | 404      | S       | Ggttt*A      | 142      | W       | 404  | 180  | 378  | 142 |
| 1050  | I  | rs2299774  | D            | N/A         | N/A     | N/A     | N/A           | N/A     | N/A     | N/A           | N/A      | N/A     | N/A          | N/A      | N/A     | N/A  | N/A  | N/A  | N/A |
| 1087  | I  | rs2299762  | U            | Aaaca*aG    | 154     | W       | Agaca*aG      | 7       | S       | Gggtc*tA      | 153      | S       | Gagtc*tA     | 3        | W       | 153  | 7    | 154  | 3   |
| 1087  | I  | rs2244188  | U            | Aagca*aG    | 14      | S       | Aaaca*aG      | 154     | W       | Ggac*tA       | 13       | W       | Gggtc*tA     | 153      | S       | 14   | 153  | 13   | 154 |
| 1087  | I  | rs2244189  | U            | Aagta*aG    | 4       | W       | Aagca*aG      | 14      | S       | Ggacc*tA      | 14       | S       | Ggac*tA      | 13       | W       | 14   | 14   | 4    | 13  |
| 1087  | I  | rs62236567 | U            | Aagtc*aG    | 323     | S       | Aagta*aG      | 4       | W       | Ggaca*tA      | 325      | W       | Ggacc*tA     | 14       | S       | 323  | 14   | 325  | 4   |
| 1087  | I  | rs2299768  | D            | Aagtc*aG    | 323     | W       | Aagtc*tG      | 1       | W       | Ggaca*tA      | 325      | W       | Ggaca*aA     | 2        | W       | N/A  | N/A  | N/A  | N/A |
| 1087  | I  | rs2299774  | D            | N/A         | N/A     | N/A     | N/A           | N/A     | N/A     | N/A           | N/A      | N/A     | N/A          | N/A      | N/A     | N/A  | N/A  | N/A  | N/A |
| 7023  | I  | rs2299762  | U            | Aact*atcgaG | 36      | W       | Agct*atcgaG   | 2       | S       | Ggct*gcaagA   | 11       | S       | Gatc*gcaagA  | 0        | W       | 11   | 2    | 36   | 0   |
| 7023  | I  | 711        | U            | Aatt*atcgaG | 129     | W       | Aact*atcgaG   | 36      | S       | Ggcc*gcaagA   | 88       | S       | Ggtc*gcaagA  | 11       | W       | 88   | 36   | 129  | 11  |
| 7023  | I  | rs2244189  | U            | Aatc*atcgaG | 188     | S       | Aatt*atcgaG   | 129     | W       | Ggct*gcaagA   | 109      | W       | Ggcc*gcaagA  | 88       | S       | 188  | 88   | 109  | 129 |
| 7023  | I  | rs2299766  | D            | Aatc*atcgaG | 188     | W       | Aatc*g t cgaG | 108     | S       | Ggct*gcaagA   | 109      | S       | Ggct*a caagA | 48       | W       | 109  | 108  | 188  | 48  |
| 7023  | I  | rs2244287  | D            | Aatc*gtcgaG | 108     | W       | Aatc*gccgaG   | 9       | S       | Ggct*a caagA  | 48       | S       | Ggct*at aagA | 5        | W       | 48   | 9    | 108  | 5   |
| 7023  | I  | rs968582   | D            | Aatc*gccgaG | 9       | S       | Aatc*gcaG     | 26      | W       | Ggct*at aagA  | 5        | W       | Ggct*atcagA  | 7        | S       | 9    | 7    | 5    | 26  |
| 7023  | I  | rs2244297  | D            | Aatc*gcaG   | 26      | S       | Aatc*gcaaG    | 5       | W       | Ggct*atcagA   | 7        | W       | Ggct*atcggA  | 1        | S       | 26   | 1    | 7    | 5   |
| 7023  | I  | rs2299767  | D            | Aatc*gcaaG  | 5       | W       | Aatc*gcaagG   | 16      | S       | Ggct*atcggA   | 1        | S       | Ggct*atcgaA  | 2        | W       | 1    | 16   | 5    | 2   |
| 7023  | I  | rs2299774  | D            | N/A         | N/A     | N/A     | N/A           | N/A     | N/A     | N/A           | N/A      | N/A     | N/A          | N/A      | N/A     | N/A  | N/A  | N/A  | N/A |
| 1290  | I  | 760        | U            | Aagtt*tcgaG | 0       | W       | Aggtt*tcgaG   | 3       | S       | Ggacg*caatA   | 0        | S       | Gaacg*caatA  | 1        | W       | 0    | 3    | 0    | 1   |
| 1290  | I  | rs2299762  | U            | Aaatt*tcgaG | 2       | W       | Aagtt*tcgaG   | 0       | S       | Gggcg*caatA   | 4        | S       | Ggacg*caatA  | 0        | W       | 4    | 0    | 2    | 0   |
| 1290  | I  | rs2299763  | U            | Aaact*tcgaG | 1       | S       | Aaatt*tcgaG   | 2       | W       | Ggggtg*caatA  | 1        | W       | Gggcg*caatA  | 4        | S       | 1    | 4    | 1    | 1   |
| 1290  | I  | rs2299765  | U            | Aaacg*tcgaG | 531     | S       | Aaact*tcgaG   | 1       | W       | Ggggtt*caatA  | 515      | W       | Ggggtg*caatA | 1        | S       | 531  | 1    | 515  |     |
| 1290  | I  | rs2244287  | D            | Aaacg*tcgaG | 531     | W       | Aaacg*ccgaG   | 7       | S       | Ggggtt*caatA  | 515      | S       | Ggggtt*taatA | 5        | W       | 515  | 7    | 531  | 5   |
| 1290  | I  | rs968582   | D            | Aaacg*ccgaG | 7       | S       | Aaacg*cagaG   | 15      | W       | Ggggtt*taatA  | 5        | W       | Ggggtt*caatA | 16       | W       | 7    | 15   | 5    | 16  |
| 1290  | I  | rs2244297  | D            | Aaacg*cagaG | 15      | S       | Aaacg*caaG    | 1       | W       | Ggggtt*tc atA | 16       | W       | Ggggtt*tcgtA | 6        | S       | 15   | 6    | 16   | 1   |
| 1290  | I  | rs2299768  | D            | Aaacg*caaG  | 1       | W       | Aaacg*caatG   | 2       | W       | Ggggtt*tcgtA  | 6        | W       | Ggggtt*tcgaA | 5        | W       | N/A  | N/A  | N/A  | N/A |
| 1290  | I  | rs2299774  | D            | N/A         | N/A     | N/A     | N/A           | N/A     | N/A     | N/A           | N/A      | N/A     | N/A          | N/A      | N/A     | N/A  | N/A  | N/A  | N/A |



|      |    |             |   |                            |     |     |                            |     |     |                            |     |     |                            |     |     |     |     |     |     |
|------|----|-------------|---|----------------------------|-----|-----|----------------------------|-----|-----|----------------------------|-----|-----|----------------------------|-----|-----|-----|-----|-----|-----|
| 1081 | II | rs35094442  | U | <u>T</u> aaa*ttC           | 36  | W   | <u>T</u> aaa*ttC           | 17  | N/A | <u>C</u> _gcg*ccA          | 26  | N/A | <u>C</u> agcg*ccA          | 55  | W   | N/A | N/A | N/A | N/A |
| 1081 | II | rs12102448  | U | <u>T</u> agaa*ttC          | 44  | S   | <u>T</u> agaa*ttC          | 36  | W   | <u>C</u> _acg*ccA          | 47  | W   | <u>C</u> _gcg*ccA          | 26  | S   | 44  | 26  | 47  | 36  |
| 1081 | II | rs12102452  | U | <u>T</u> agca*ttC          | 1   | S   | <u>T</u> agca*ttC          | 44  | W   | <u>C</u> _aag*ccA          | 2   | W   | <u>C</u> _acg*ccA          | 47  | S   | 1   | 47  | 2   | 44  |
| 1081 | II | rs199937311 | U | <u>T</u> agcg*ttC          | 180 | S   | <u>T</u> agc <u>a</u> *ttC | 1   | W   | <u>C</u> _aaa*ccA          | 168 | W   | <u>C</u> _aag*ccA          | 2   | S   | 180 | 2   | 168 | 1   |
| 1081 | II | rs12445929  | D | <u>T</u> agcg* <u>t</u> tC | 180 | W   | <u>T</u> agcg* <u>c</u> tC | 0   | S   | <u>C</u> _aaa* <u>c</u> cA | 168 | S   | <u>C</u> _aaa* <u>t</u> cA | 0   | W   | 168 | 0   | 180 | 0   |
| 1081 | II | rs8060928   | D | <u>T</u> agcg* <u>c</u> tC | 0   | W   | <u>T</u> agcg* <u>c</u> cC | 2   | S   | <u>C</u> _aaa* <u>t</u> cA | 0   | S   | <u>C</u> _aaa* <u>t</u> tA | 4   | W   | 0   | 2   | 0   | 4   |
| 1081 | II | rs4786855   | D | N/A                        | N/A | N/A | N/A | N/A | N/A | N/A |

Number of recombinants recovered at each segregating site for strong (S) and weak (W) alleles of the SNP of interest (underlined) either upstream (U) or downstream (D) the DSB center. Under the null hypothesis of 1:1 segregation, the ratio of the number of SNPs proximal (p) and distal (d) from the crossover of a strong allele should equal the ratio of the number of SNPs before and after a weak allele. Hotspots are HS: I or II; RI and RII allele indicate the allele occurring on the (arbitrarily defined) recombinant I or recombinant II haplotype; S indicates whether the RI or RII haplotypes contains either a G or C allele at this site, and W indicates whether it is A or T allele.
